# Supplementary material for: Therapeutic Peptide Amphiphile as a Drug Carrier with ATP-Triggered Release for Synergistic Effect, Improved Therapeutic Index, and Penetration of 3D Cancer Cell Spheroids
Source: PubMed Central journal article supplement (PMC6165277; doi:10.3390/ijms19092773), 2018-09-14
Supplement: ijms-19-02773-s001.pdf [file ijms-19-02773-s001.pdf]

# Therapeutic Peptide Amphiphile as a Drug Carrier with ATP-triggered Release for Synergistic effect, Improved Therapeutic Index and Penetration of 3D Cancer Cell Spheroids

Sheng Lu <sup>1,Δ</sup>, Feng Zhao <sup>2,Δ</sup>, Qiuxin Zhang <sup>2,3</sup> and P. Chen <sup>1,\*</sup>

<sup>1</sup> Department of Chemical Engineering and Waterloo Institute for Nanotechnology, University of Waterloo, Waterloo, Ontario, N2L 3G1, Canada; shanel825@gmail.com (S.L.)

<sup>2</sup> Faculty of Science, University of Waterloo, Waterloo, Ontario, N2L 3G1, Canada; q344zhang@edu.uwaterloo.ca (Q.Z.), zhaofeng87806698@163.com (F.Z.)

<sup>3</sup> College of Nano Science and Technology, Soochow University, Suzhou, Jiangsu Province 215123, China;

\* Correspondence: p4chen@uwaterloo.ca; Tel.: +1-519-888-4567, ext. 35586

Δ The authors contribute equally to this work

## Supporting information

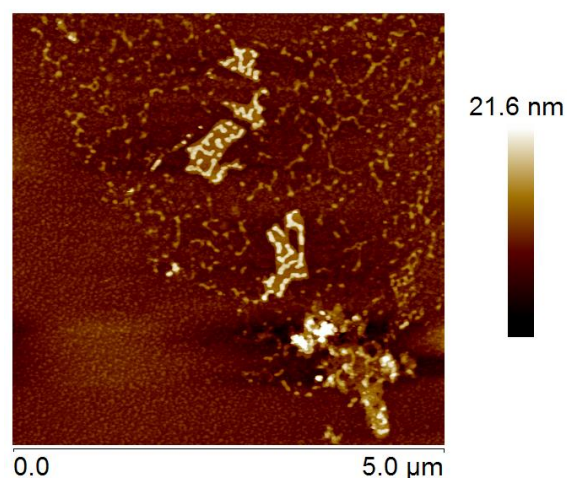

Figure S1. AFM image of PAH6 at the concentration of 60 µg/ml.

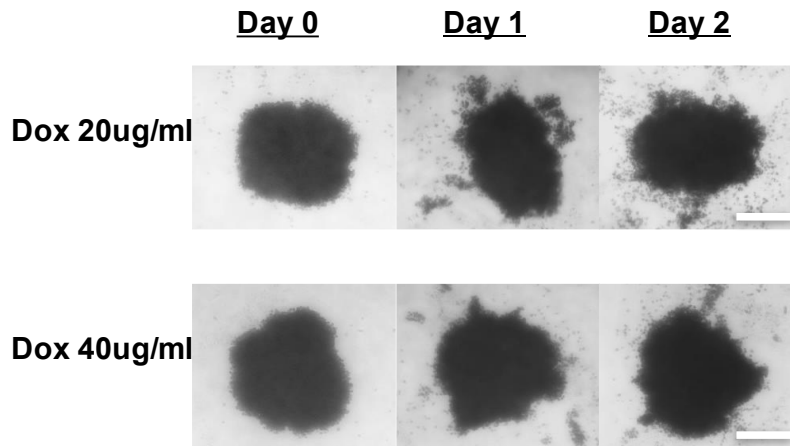

**Figure S2.** Optical micrographs of 3D A549 spheroids treated with Dox. The scale bar indicates 260  $\mu\text{m}$ .

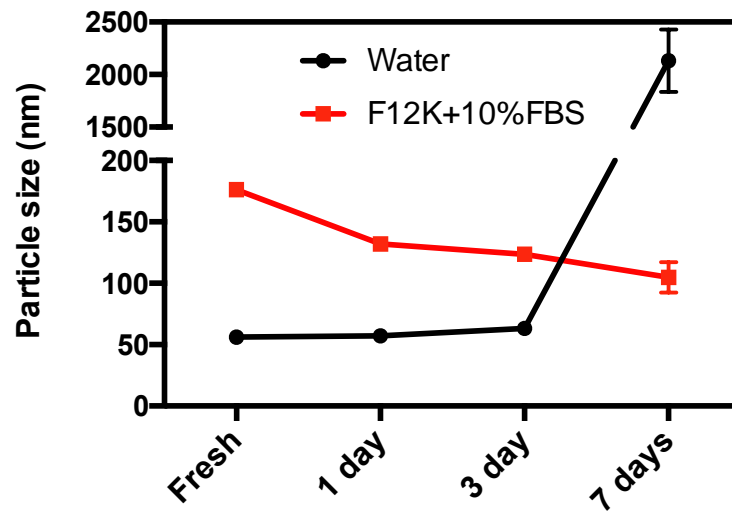

**Figure S3.** The averaged particle size of the Dox-DNA/PAH6 nano-complex in water or in F12K media containing 10% of FBS. The mass ratio of PAH6 to Dox-DNA is at 60:11. Error bars represent s.d. (n=3).

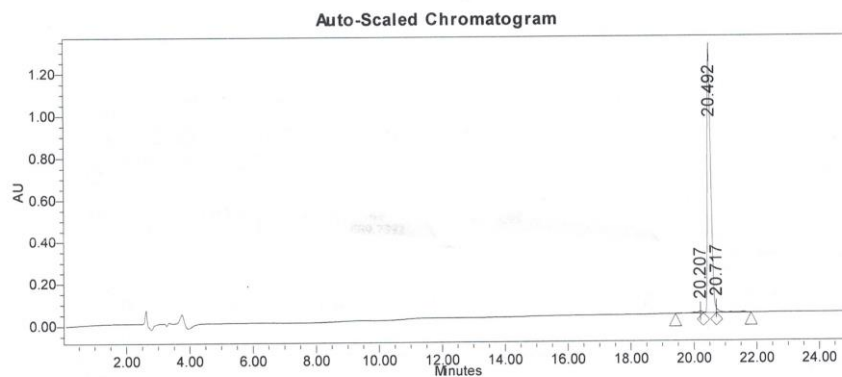

**Peak Results**

| Name | RT     | Area    | Height  | % Area |
|------|--------|---------|---------|--------|
| 1    | 20.207 | 95714   | 8677    | 0.96   |
| 2    | 20.492 | 9630995 | 1273264 | 96.67  |
| 3    | 20.717 | 236397  | 21648   | 2.37   |

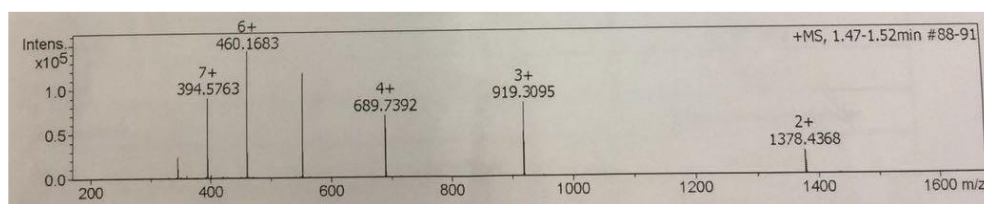

Figure S4. HPLC spectra of PAH6 (Top) and MS results for PAH6 (bottom) provided by the supplier.

Table S1. The sequences of oligonucleotides.

| Oligonucleotide                  | Sequence                                  |
|----------------------------------|-------------------------------------------|
| ATP aptamer                      | 5'-ACC TGG GGG AGT ATT GCG GAG GAA GGT-3' |
| Complementary DNA of ATP aptamer | 5'-ACC TTC CTC CGC AAT ACT CCC CCA GGT-3' |

**Table S2. Combination index values of Dox-DNA/PAH6 on different cell lines.**

| <b>CI values</b>     | <b>A549</b> | <b>HCT116</b> | <b>NIH-3T3</b> |
|----------------------|-------------|---------------|----------------|
| Dox-DNA/PAH6 (11:40) | <b>0.72</b> | <b>N/A</b>    | <b>&gt;1</b>   |
| Dox-DNA/PAH6 (11:60) | <b>0.43</b> | <b>0.51</b>   | <b>&gt;1</b>   |
